# Supplementary material for: High-throughput screening of TMOCl cathode materials based on the full-cell system for chloride-ion batteries
Source: Royal Society of Chemistry journal article supplement (doi:10.1039/d1ta06779f), 2021-01-01
Supplement: d1ta06779f1.pdf [file d1ta06779f1.pdf]

## Supporting Information

### High throughput Screening of TMOCl Cathode Materials based on Full-Cell System for Chloride-Ion Batteries

*Mengqi Wu<sup>a</sup>, Xiaohuan Lv<sup>a</sup>, Jianglong Wang<sup>a</sup>, Ruining Wang<sup>a</sup>, Xingqiang Shi<sup>a</sup>, Hu Zhang<sup>a</sup>,  
Chendong Jin<sup>†</sup>, Yingjin Wei<sup>b</sup>, Ruqian Lian<sup>a, \*</sup>*

<sup>a</sup> Key Laboratory of Optic-Electronic Information and Materials of Hebei Province, National-Local Joint Engineering Laboratory of New Energy Photoelectric Devices, College of Physics Science and Technology, Hebei University, Baoding 071002, P. R. China.

<sup>b</sup> Key Laboratory of Physics and Technology for Advanced Batteries (Ministry of Education), College of Physics, Jilin University, Changchun 130012, China.

Corresponding Author

\* E-mail: rqlian@126.com

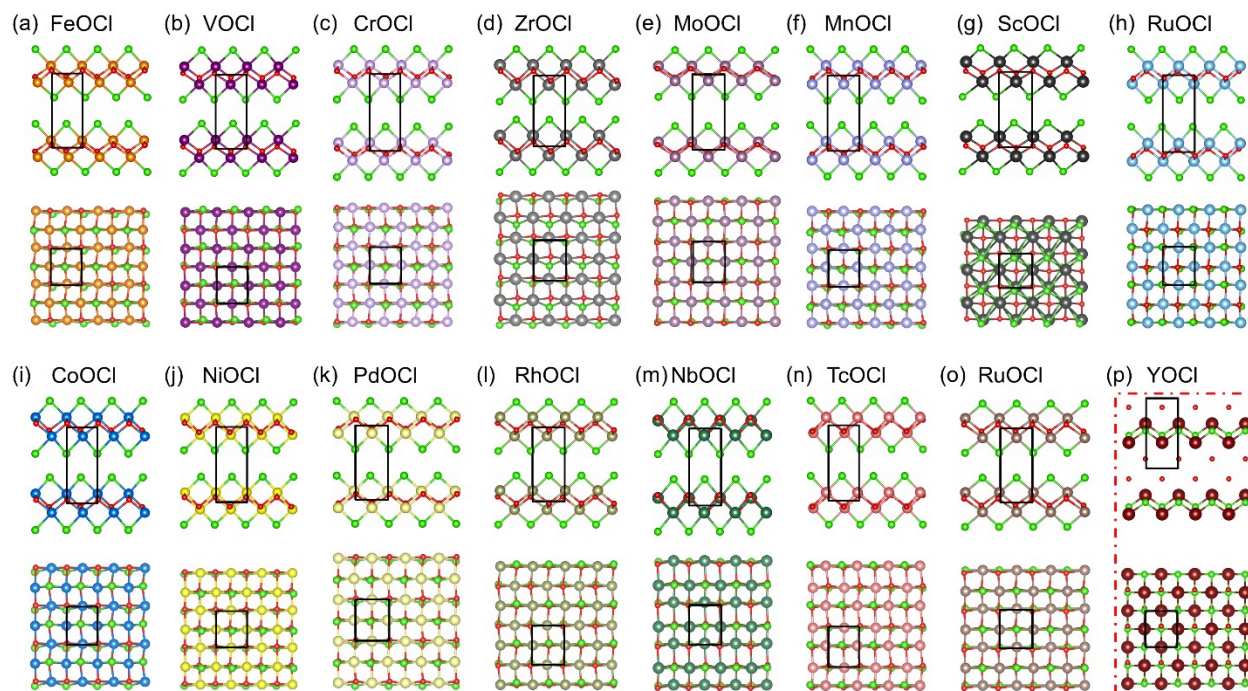

**Figure S1.** The simulated structure of (a) FeOCl, (b) VOCl, (c) CrOCl, (d) ZrOCl, (e) MoOCl, (f) MnOCl, (g) ScOCl, (h) RuOCl, (i) CoOCl, (j) NiOCl, (k) PdOCl, (l) RhOCl, (m) NbOCl, (n) TcOCl, (o) RuOCl, and (p) YOCl at 600 K after 10 ps.

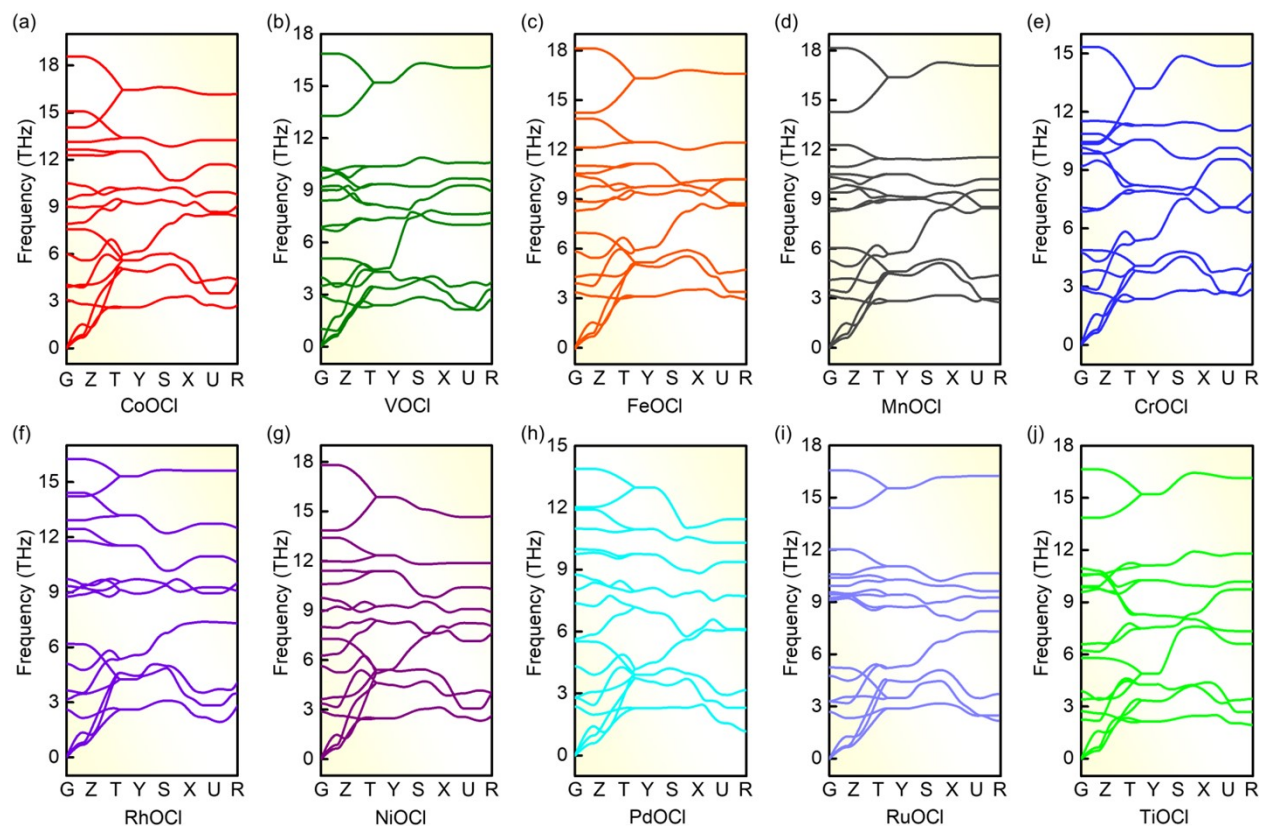

**Figure S2.** Phonon band structure of (a) CoOCl, (b) VOCl, (c) FeOCl, (d) MnOCl, (e) CrOCl, (f) RhOCl, (g) NiOCl, (h) PdOCl, (i) RuOCl, and (j) TiOCl.

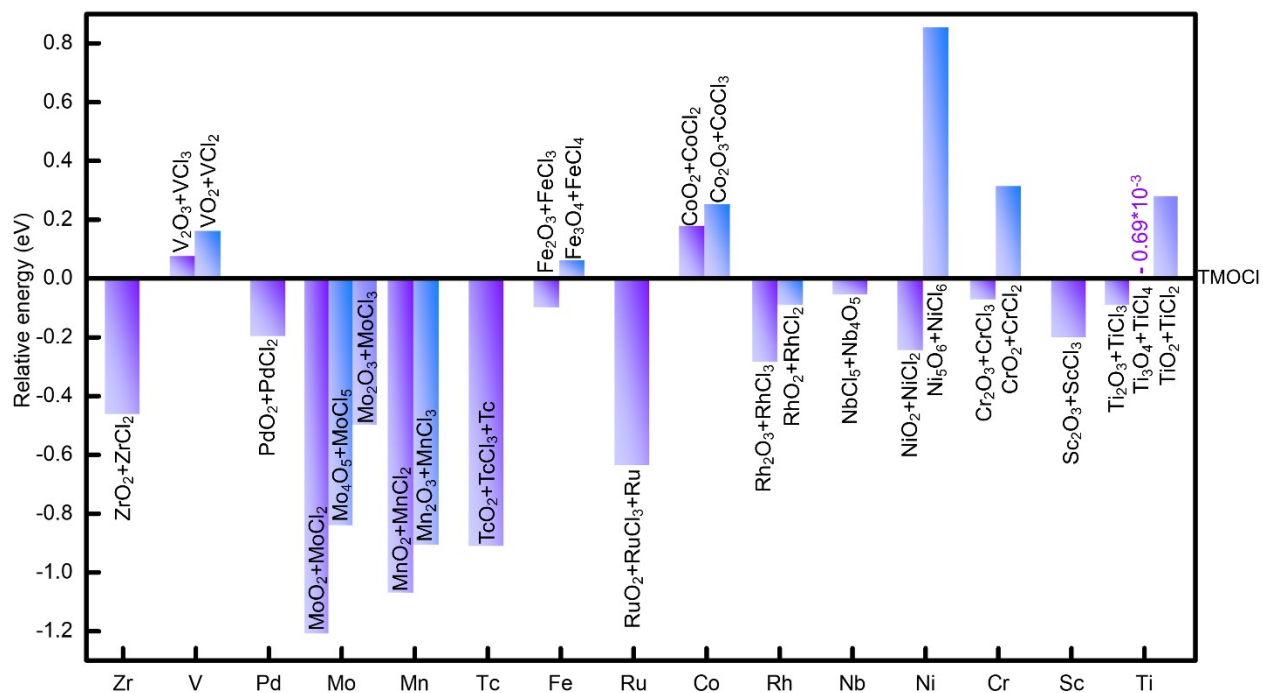

**Figure S3.** The relative energy between TMOCl and their possible decomposition products, where TMOCl is used as a reference.

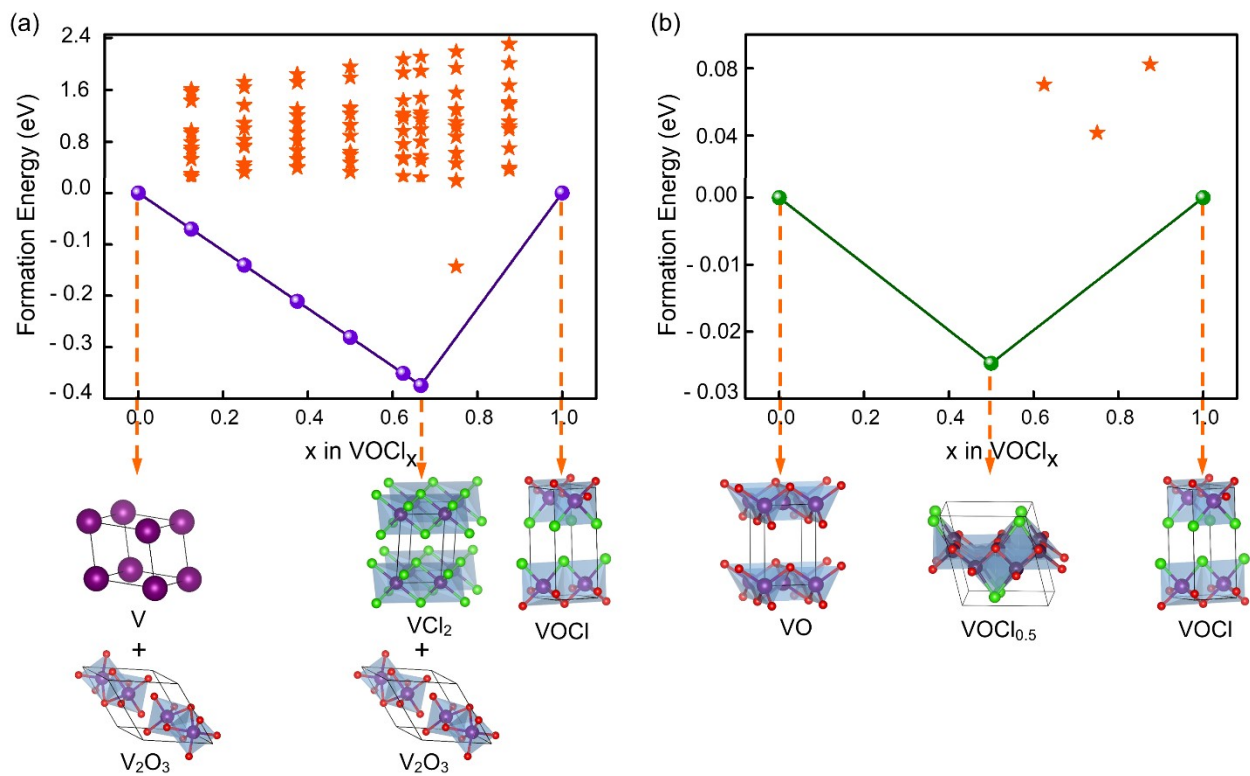

**Figure S4.** Formation energy of  $\text{VOCl}_x$  following (a) decomposition reaction and (b) deintercalation reaction.

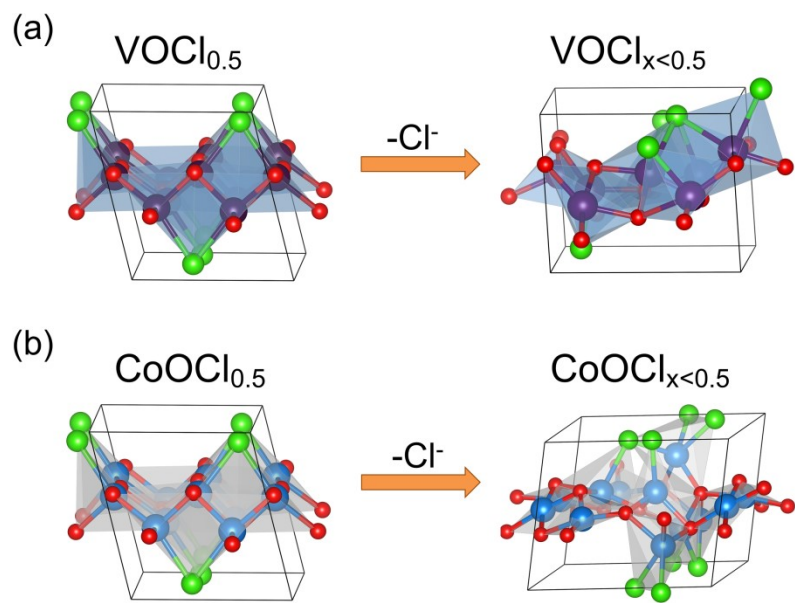

**Figure S5.** Structures of (a)  $\text{VOCl}_{0.5}$  and  $\text{VOCl}_{0.375}$ , (b)  $\text{CoOCl}_{0.5}$  and  $\text{CoOCl}_{0.375}$ .

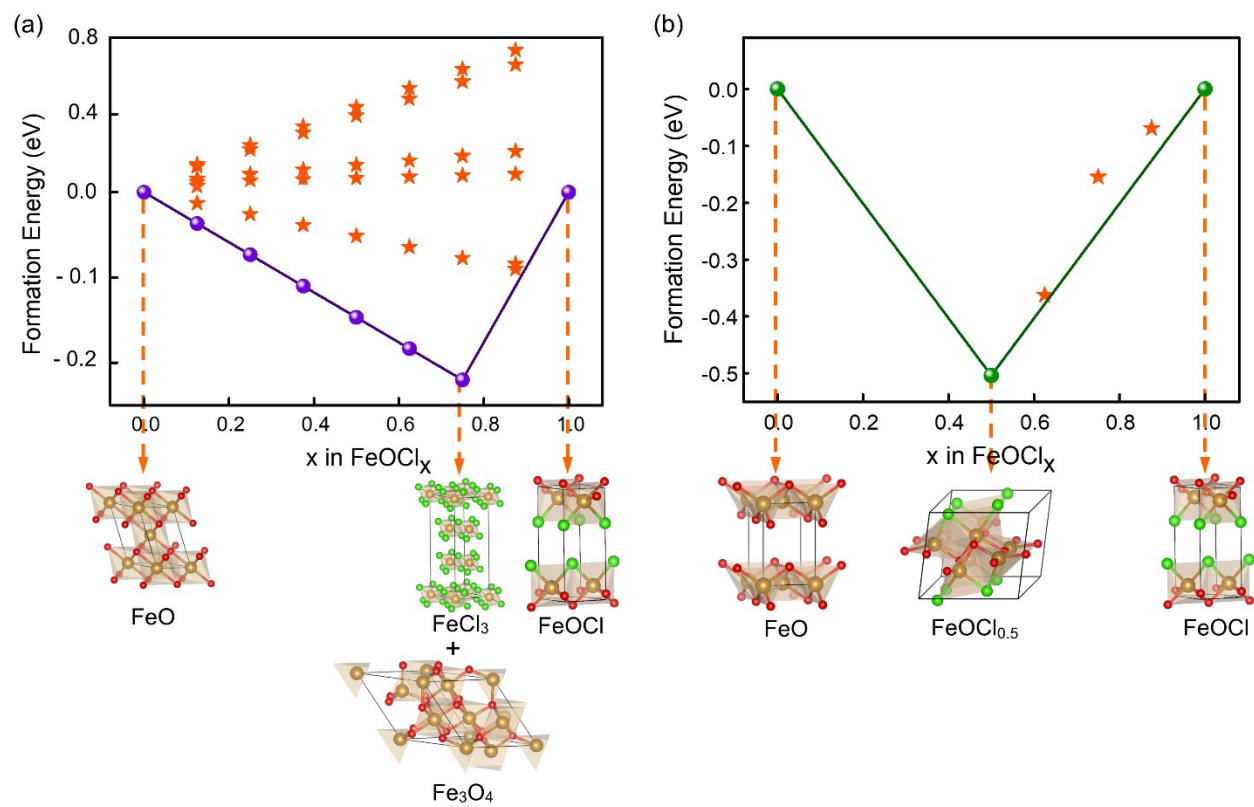

**Figure S6.** Formation energy of  $\text{FeOCl}_x$  following (a) decomposition reaction and (b) deintercalation reaction.



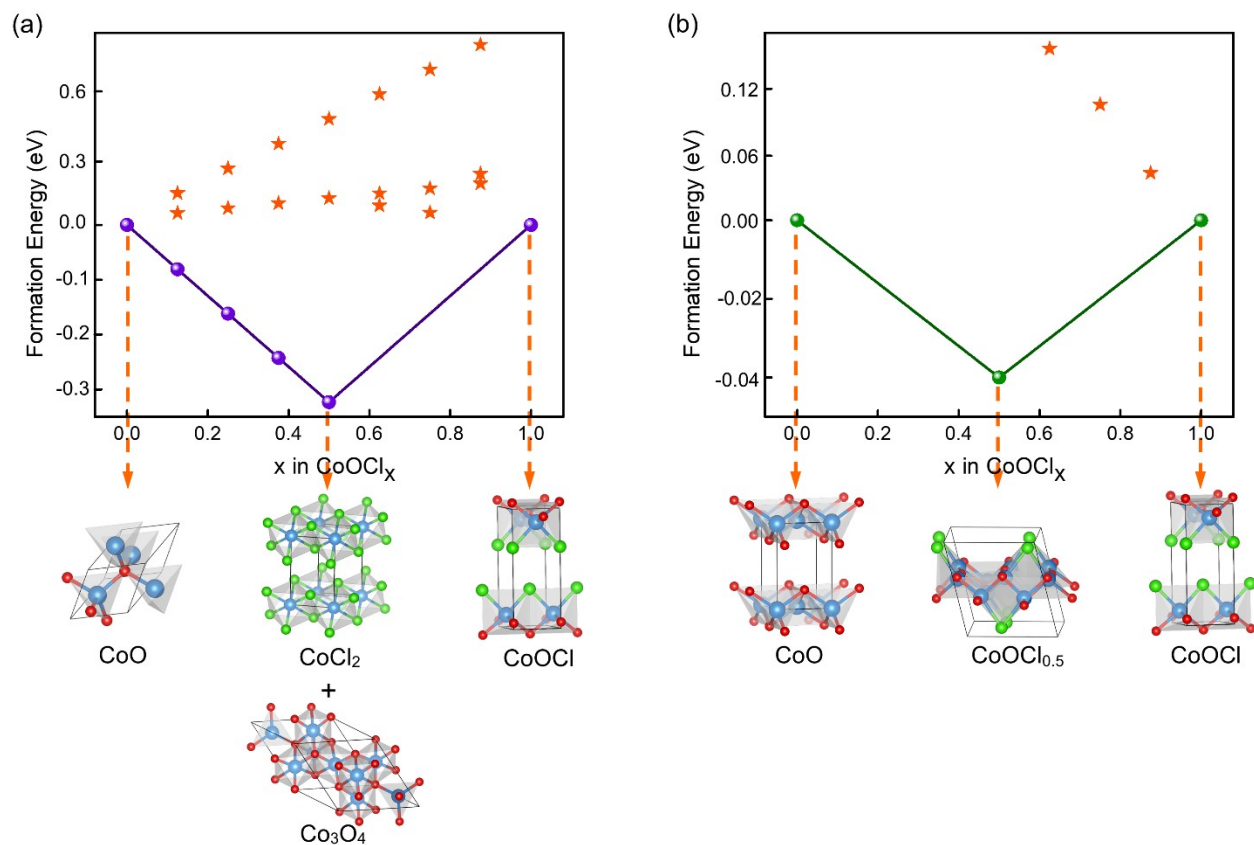

**Figure S7.** Formation energy of  $\text{CoOCl}_x$  following (a) decomposition reaction and (b) deintercalation reaction.



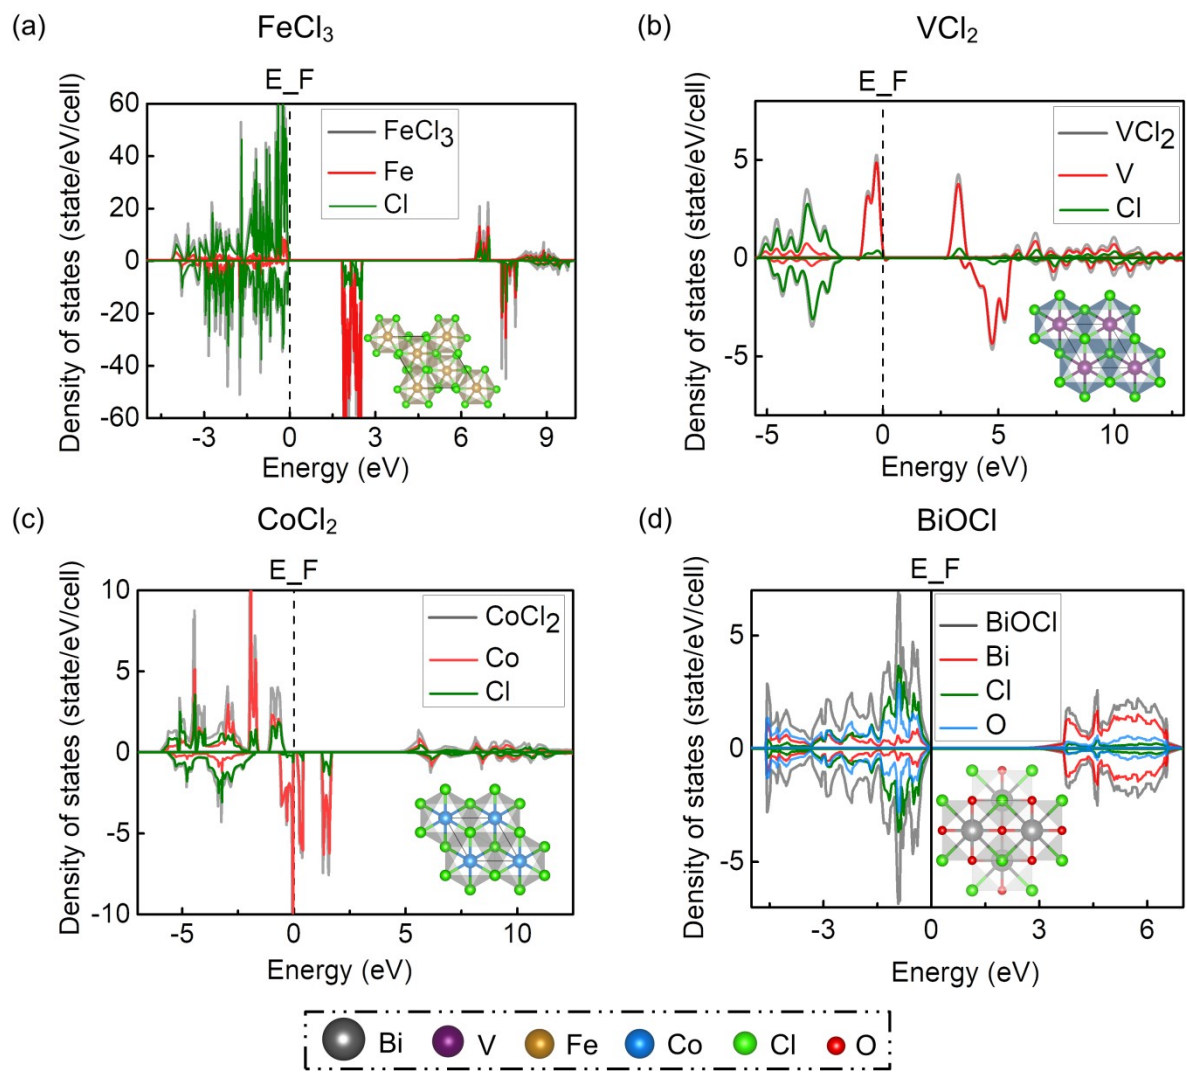

**Figure S8.** Density of states of (a) FeCl<sub>3</sub>, (b) VCl<sub>2</sub>, (c) CoCl<sub>2</sub>, and (d) BiOCl.
